# Supplementary material
Source: PubMed Central journal article supplement (PMC3086077)
Supplement: NIHMS282207-supplement-1.pdf [file NIHMS282207-supplement-1.pdf]

SUPPLEMENTAL MATERIAL

| <b>Supplemental Table 1. Genotype Frequency of the S1103Y variant by ICD therapy</b> |                    |    |    |
|--------------------------------------------------------------------------------------|--------------------|----|----|
|                                                                                      | Genotype Frequency |    |    |
|                                                                                      | rs7626962 - S1103Y |    |    |
|                                                                                      | CC                 | CA | AA |
| Appropriate ICD therapy                                                              | 15                 | 8  | 0  |
| No Appropriate ICD therapy                                                           | 77                 | 11 | 1  |
